# Supplementary material
Source: publisher site journal article supplement (http://www.kjim.org/upload/media/kjim-2016-343-suppl2.pdf)
Supplement: Supplementary file 1 [file kjim-2016-343-suppl2.pdf]

**Supplementary Table 2. Baseline characteristics and metabolic syndrome status of female subjects**

| Characteristic                 | Overall        | Metabolic syndrome |                | p value |
|--------------------------------|----------------|--------------------|----------------|---------|
|                                |                | No                 | Yes            |         |
| No. of subjects                | 92,745         | 67,284 (72.55)     | 25,461 (27.45) |         |
| Age group, yr                  |                |                    |                | < 0.001 |
| 20-44                          | 37,081 (39.98) | 34,366 (51.08)     | 2,715 (10.66)  |         |
| 45-65                          | 41,507 (44.75) | 27,704 (41.17)     | 13,803 (54.21) |         |
| Above 65                       | 14,157 (15.26) | 5,214 (7.75)       | 8,943 (35.12)  |         |
| BMI, kg/m <sup>2</sup>         | 23.17 ± 3.34   | 22.27 ± 2.89       | 25.56 ± 3.29   | < 0.001 |
| Waist, cm                      | 76.14 ± 8.89   | 73.25 ± 7.40       | 83.76 ± 7.91   | < 0.001 |
| SBP, mmHg                      | 119.72 ± 15.63 | 115.90 ± 13.78     | 129.82 ± 15.75 | < 0.001 |
| DBP, mmHg                      | 74.21 ± 10.03  | 72.32 ± 9.29       | 79.20 ± 10.18  | < 0.001 |
| FBG, mg/dL                     | 95.10 ± 21.44  | 90.43 ± 13.89      | 107.41 ± 30.90 | < 0.001 |
| TC, mg/dL                      | 195.85 ± 37.54 | 191.90 ± 35.39     | 206.27 ± 40.91 | < 0.001 |
| TG, mg/dL                      | 111.86 ± 74.42 | 91.88 ± 52.94      | 164.67 ± 94.47 | < 0.001 |
| HDL-C, mg/dL                   | 60.10 ± 33.63  | 63.00 ± 33.78      | 52.44 ± 32.02  | < 0.001 |
| LDL-C, mg/dL                   | 115.50 ± 39.72 | 112.74 ± 38.66     | 122.79 ± 41.51 | < 0.001 |
| Cr, mg/dL                      | 0.92 ± 1.00    | 0.92 ± 1.03        | 0.91 ± 0.94    | 0.668   |
| AST, mg/dL                     | 22.90 ± 13.15  | 21.75 ± 11.62      | 25.93 ± 16.13  | < 0.001 |
| ALT, mg/dL                     | 19.97 ± 18.04  | 18.05 ± 16.17      | 25.05 ± 21.41  | < 0.001 |
| γGT, mg/dL                     | 22.04 ± 24.95  | 19.45 ± 19.77      | 28.89 ± 34.20  | < 0.001 |
| Hypertension                   | 20,394 (22.48) | 6,131 (9.36)       | 14,263 (56.56) | < 0.001 |
| Diabetes mellitus              | 10,757 (11.86) | 2,191 (3.35)       | 8,566 (33.98)  | < 0.001 |
| Cardiac disorders              | 6,129 (6.76)   | 1,900 (2.90)       | 4,229 (16.78)  | < 0.001 |
| Stroke                         | 2,283 (2.52)   | 628 (0.96)         | 1,655 (6.57)   | < 0.001 |
| Smoking status                 |                |                    |                | < 0.001 |
| Non-smokers                    | 87,013 (95.14) | 62,954 (94.93)     | 24,059 (95.67) |         |
| Past smokers                   | 1,409 (1.54)   | 1,098 (1.66)       | 311 (1.24)     |         |
| Current smokers                | 3,040 (3.32)   | 2,263 (3.41)       | 777 (3.09)     |         |
| Alcohol consumption            |                |                    |                | < 0.001 |
| Non-drinkers                   | 64,289 (70.45) | 43,353 (65.49)     | 20,936 (83.56) |         |
| Social drinkers                | 9,448 (10.35)  | 7,794 (11.77)      | 1,654 (6.60)   |         |
| Heavy drinkers                 | 17,516 (19.19) | 15,052 (22.74)     | 2,464 (9.83)   |         |
| Exercise status                |                |                    |                | < 0.001 |
| Non-active                     | 80,103 (87.73) | 58,376 (88.18)     | 21,727 (86.55) |         |
| Active                         | 11,199 (12.27) | 7,824 (11.82)      | 3,375 (13.45)  |         |
| House hold income level        |                |                    |                | < 0.001 |
| 0-3                            | 26,560 (28.64) | 19,859 (29.52)     | 6,701 (26.32)  |         |
| 4-7                            | 36,738 (39.61) | 27,825 (41.35)     | 8,913 (35.01)  |         |
| 8-10                           | 29,447 (31.75) | 19,600 (29.13)     | 9,847 (38.67)  |         |
| Modified NCEP-ATP III criteria |                |                    |                |         |
| Abdominal obesity              | 27,393 (29.54) | 9,553 (14.20)      | 17,840 (70.07) | < 0.001 |
| Hypertriglyceridemia           | 29,944 (32.29) | 9,972 (14.82)      | 19,972 (78.44) | < 0.001 |
| Low HDL-C level                | 25,633 (27.64) | 11,432 (16.99)     | 14,201 (55.78) | < 0.001 |
| High blood pressure            | 39,010 (42.06) | 17,145 (25.48)     | 21,865 (85.88) | < 0.001 |
| Hyperglycemia                  | 28,217 (30.42) | 10,817 (16.08)     | 17,400 (68.34) | < 0.001 |

Values are presented as number (%) or geometric mean ± SD. Percentages may not sum to 100% because of missing data. Abdominal obesity, waist circumference ≥ 90 cm in men and ≥ 85 cm in women; hypertriglyceridemia, serum triglyceride ≥ 150 mg/dL; low HDL-C level, HDL-C < 40 mg/dL in men and < 50 mg/dL in women; high blood pressure, blood pressure ≥ 130/85 mmHg or current use of antihypertensive medication; hyperglycemia, serum glucose ≥ 100 mg/dL or current use of medication for diabetes. BMI, body mass index; SBP, systolic blood pressure; DBP, diastolic blood pressure; FBG, fasting blood glucose; TC, total cholesterol; TG, triglyceride; HDL-C, high density lipoprotein cholesterol; LDL-C, low density lipoprotein cholesterol; Cr, creatinine; AST, aspartate transaminase; ALT, alanine aminotransferase; γGT, gamma-glutamyl transpeptidase; NCEP-ATP, National Cholesterol Education Program-Adult Treatment Panel.
